# Supplementary material
Source: PubMed Central journal article supplement (PMC9638953)
Supplement: jama-e2220149-s001.pdf [file jama-e2220149-s001.pdf]

## Supplemental Online Content

Jollis JG, Granger CB, Zègre-Hemsey JK, et al. Treatment time and in-hospital mortality among patients with ST-segment elevation myocardial infarction, 2018-2021. *JAMA*. doi:10.1001/jama.2022.20149

**eTable 1.** Process Time Goals From Select Mission: Lifeline Quality Improvement Programs

**eTable 2.** Characteristics of GWTG-CAD Registry Hospitals

**eTable 3.** Selected Characteristics of Patients With STEMI or STEMI Equivalent by Year Quarter

**eTable 4.** Hospital-Specified Reasons for Delay by Year Quarter

**eTable 5.** Model Diagnostics for Multivariate Logistic Regression

This supplemental material has been provided by the authors to give readers additional information about their work.

eTable 1. Process Time Goals From Select Mission: Lifeline Quality Improvement Programs

| Mode of presentation                                                      | Process time goal                                                                                                |
|---------------------------------------------------------------------------|------------------------------------------------------------------------------------------------------------------|
| Directly presenting to PCI-capable hospital by emergency medical services | First evaluated by paramedics time to cardiac catheterization laboratory activation time within 20 minutes       |
|                                                                           | Emergency department wait time (hospital arrival time to cardiac catheterization arrival time) within 15 minutes |
|                                                                           | Hospital arrival time to PCI device deployment time within 90 minutes                                            |
| Directly presenting to PCI-capable hospital by walk in                    | Hospital arrival time to ECG time within 10 minutes                                                              |
|                                                                           | Hospital arrival time to PCI device deployment time within 90 minutes                                            |
| Transferred from another hospital                                         | Arrival at first hospital to departure within 30 minutes                                                         |
|                                                                           | First hospital arrival time to PCI device deployment time within 120 minutes                                     |

eTable 2. Characteristics of GWTG-CAD Registry Hospitals

| Characteristics                                                     | Number of Hospitals | Percentage |
|---------------------------------------------------------------------|---------------------|------------|
| Total Number                                                        | 601                 | 100        |
| Accreditation by The Joint Commission                               |                     |            |
| Yes                                                                 | 466                 | 77.5       |
| No                                                                  | 96                  | 16.0       |
| Not available                                                       | 39                  | 6.5        |
| Critical access hospital                                            |                     |            |
| Yes                                                                 | 129                 | 21.5       |
| No                                                                  | 405                 | 67.4       |
| Not available                                                       | 67                  | 11.1       |
| Rural referral center                                               |                     |            |
| Yes                                                                 | 151                 | 25.1       |
| No                                                                  | 411                 | 68.4       |
| Not available                                                       | 39                  | 6.5        |
| Sole community provider                                             |                     |            |
| Yes                                                                 | 19                  | 3.2        |
| No                                                                  | 543                 | 90.3       |
| Not available                                                       | 39                  | 6.5        |
| Medical school affiliation reported to American Medical Association |                     |            |
| Yes                                                                 | 366                 | 60.9       |
| No                                                                  | 196                 | 33.6       |
| Not available                                                       | 39                  | 6.5        |
| Hospital location                                                   |                     |            |
| Rural                                                               | 63                  | 10.5       |
| Urban                                                               | 499                 | 83.0       |
| Not available                                                       | 39                  | 6.5        |
| Teaching status                                                     |                     |            |
| Major                                                               | 80                  | 13.3       |
| Minor                                                               | 355                 | 59.1       |
| Non-teaching                                                        | 127                 | 21.1       |
| Not available                                                       | 39                  | 6.5        |
| Hospital size                                                       |                     |            |
| Large                                                               | 153                 | 25.4       |
| Medium                                                              | 352                 | 58.6       |
| Small                                                               | 57                  | 9.5        |
| Not available                                                       | 39                  | 6.5        |
| Bed size                                                            |                     |            |
| 6-24 beds                                                           | 4                   | 0.7        |
| 25-49 beds                                                          | 17                  | 2.8        |
| 50-99 beds                                                          | 36                  | 6.0        |
| 100-199 beds                                                        | 134                 | 22.3       |

|                                              |     |      |
|----------------------------------------------|-----|------|
| 200-299 beds                                 | 138 | 23.0 |
| 300-399 beds                                 | 79  | 13.1 |
| 400-499 beds                                 | 52  | 8.7  |
| 500 or more beds                             | 102 | 17.0 |
| Not available                                | 39  | 6.5  |
| Adult cardiology services                    |     |      |
| Yes                                          | 444 | 73.8 |
| No                                           | 19  | 3.2  |
| Not available                                | 138 | 23.0 |
| Adult diagnostic catheterization             |     |      |
| Yes                                          | 430 | 71.5 |
| No                                           | 33  | 5.5  |
| Not available                                | 138 | 23.0 |
| Cardiac rehabilitation                       |     |      |
| Yes                                          | 383 | 63.7 |
| No                                           | 80  | 13.3 |
| Not available                                | 138 | 23.0 |
| Adult cardiac surgery                        |     |      |
| Yes                                          | 294 | 48.9 |
| No                                           | 169 | 28.1 |
| Not available                                | 138 | 23.0 |
| Adult interventional cardiac catheterization |     |      |
| Yes                                          | 418 | 69.5 |
| No                                           | 45  | 7.5  |
| Not available                                | 138 | 23.0 |
| STEMI receiving/referring                    |     |      |
| Receiving                                    | 505 | 84.0 |
| Referring                                    | 60  | 10.0 |
| Not available                                | 36  | 6.0  |
| PCI capable center                           |     |      |
| 24 hour PCI capable                          | 496 | 82.5 |
| Non 24 hour PCI capable                      | 12  | 2.0  |
| Non PCI center                               | 51  | 8.5  |
| Not available                                | 42  | 7.0  |

eTable 3. Selected Characteristics of Patients with STEMI or STEMI Equivalent by Year Quarter

| Characteristics                                                | Categorical descriptors N (%), Continuous descriptors Median (Interquartile range) |                   |                   |                   |                   |                   |                   |                   |                   |                   |                   |                   |                   |                   |
|----------------------------------------------------------------|------------------------------------------------------------------------------------|-------------------|-------------------|-------------------|-------------------|-------------------|-------------------|-------------------|-------------------|-------------------|-------------------|-------------------|-------------------|-------------------|
|                                                                | Q2 2018<br>N=8858                                                                  | Q3 2018<br>N=8429 | Q4 2018<br>N=8717 | Q1 2019<br>N=8560 | Q2 2019<br>N=8675 | Q3 2019<br>N=8521 | Q4 2019<br>N=8542 | Q1 2020<br>N=8622 | Q2 2020<br>N=7574 | Q3 2020<br>N=7864 | Q4 2020<br>N=7943 | Q1 2021<br>N=7873 | Q2 2021<br>N=7926 | Q3 2021<br>N=6767 |
| Age                                                            | 62 (54, 71)                                                                        | 62 (53, 71)       | 62 (54, 71)       | 63 (54, 72)       | 63 (54, 72)       | 63 (55, 71)       | 63 (55, 72)       | 63 (54, 72)       | 62 (54, 71)       | 63 (54, 71)       | 63 (54, 72)       | 63 (55, 72)       | 63 (54, 72)       | 63 (54, 72)       |
| Male                                                           | 6349 (71.7)                                                                        | 6050 (71.8)       | 6135 (70.4)       | 6071 (70.9)       | 6167 (71.1)       | 6064 (71.2)       | 5986 (70.1)       | 6106 (70.8)       | 5417 (71.5)       | 5667 (72.1)       | 5562 (70.0)       | 5620 (71.4)       | 5626 (71.0)       | 4828 (71.3)       |
| Female                                                         | 2509 (28.3)                                                                        | 2379 (28.2)       | 2582 (29.6)       | 2489 (29.1)       | 2508 (28.9)       | 2457 (28.8)       | 2556 (29.9)       | 2516 (29.2)       | 2157 (28.5)       | 2197 (27.9)       | 2381 (30.0)       | 2253 (28.6)       | 2300 (29.0)       | 1939 (28.7)       |
| Race and ethnicity                                             |                                                                                    |                   |                   |                   |                   |                   |                   |                   |                   |                   |                   |                   |                   |                   |
| American Indian/Alaskan Native                                 | 46 (0.5)                                                                           | 39 (0.5)          | 45 (0.5)          | 36 (0.4)          | 45 (0.5)          | 47 (0.6)          | 56 (0.7)          | 48 (0.6)          | 46 (0.6)          | 45 (0.6)          | 49 (0.6)          | 49 (0.6)          | 44 (0.6)          | 25 (0.4)          |
| Asian                                                          | 308 (3.5)                                                                          | 262 (3.1)         | 272 (3.1)         | 300 (3.5)         | 318 (3.7)         | 311 (3.6)         | 308 (3.6)         | 365 (4.2)         | 264 (3.5)         | 283 (3.6)         | 312 (3.9)         | 328 (4.2)         | 340 (4.3)         | 308 (4.6)         |
| Black                                                          | 1002 (11.3)                                                                        | 901 (10.7)        | 857 (9.8)         | 922 (10.8)        | 899 (10.4)        | 951 (11.2)        | 929 (10.9)        | 962 (11.2)        | 806 (10.6)        | 846 (10.8)        | 827 (10.4)        | 878 (11.2)        | 928 (11.7)        | 789 (11.7)        |
| Hispanic                                                       | 646 (7.3)                                                                          | 645 (7.7)         | 714 (8.2)         | 731 (8.5)         | 772 (8.9)         | 758 (8.9)         | 679 (7.9)         | 677 (7.9)         | 559 (7.4)         | 549 (7.0)         | 600 (7.6)         | 671 (8.5)         | 655 (8.3)         | 574 (8.5)         |
| Native Hawaiian/Pacific Islander                               | 25 (0.3)                                                                           | 11 (0.1)          | 26 (0.3)          | 24 (0.3)          | 20 (0.2)          | 20 (0.2)          | 25 (0.3)          | 9 (0.1)           | 23 (0.3)          | 19 (0.2)          | 27 (0.3)          | 20 (0.3)          | 35 (0.4)          | 22 (0.3)          |
| Non-Hispanic White                                             | 6637 (74.9)                                                                        | 6346 (75.3)       | 6581 (75.5)       | 6309 (73.7)       | 6387 (73.6)       | 6206 (72.8)       | 6299 (73.7)       | 6279 (72.8)       | 5653 (74.6)       | 5914 (75.2)       | 5894 (74.2)       | 5622 (71.4)       | 5666 (71.5)       | 4732 (69.9)       |
| Not specified                                                  | 194 (2.2)                                                                          | 225 (2.7)         | 222 (2.5)         | 238 (2.8)         | 234 (2.7)         | 228 (2.7)         | 246 (2.9)         | 282 (3.3)         | 223 (2.9)         | 208 (2.6)         | 234 (2.9)         | 305 (3.9)         | 258 (3.3)         | 317 (4.7)         |
| Heart rate documented on first medical contact, median (IQR)   | 79 (66, 94)                                                                        | 78 (64, 93)       | 79 (65, 94)       | 80 (66, 94)       | 80 (66, 94)       | 78 (65, 94)       | 79 (65, 95)       | 80 (66, 95)       | 80 (66, 95)       | 80 (66, 95)       | 80 (66, 95)       | 81 (66, 96)       | 80 (66, 95)       | 80 (66, 95)       |
| Systolic blood pressure on first medical contact, median (IQR) | 145 (125, 168)                                                                     | 149 (126, 171)    | 143 (122, 165)    | 144 (122, 167)    | 143 (120, 166)    | 142 (120, 164)    | 144 (120, 167)    | 144 (120, 167)    | 145 (122, 168)    | 144 (121, 166)    | 144 (121, 166)    | 145 (121, 168)    | 145 (122, 167)    | 143 (120, 166)    |

|                                                         |                      |                      |                      |                      |                      |                      |                      |                      |                      |                      |                      |                      |                      |                       |
|---------------------------------------------------------|----------------------|----------------------|----------------------|----------------------|----------------------|----------------------|----------------------|----------------------|----------------------|----------------------|----------------------|----------------------|----------------------|-----------------------|
| Cardiac arrest prior to arrival                         |                      |                      |                      |                      |                      |                      |                      |                      |                      |                      |                      |                      |                      |                       |
| Yes                                                     | 427/323<br>0 (13.2)  | 422/322<br>5 (13.1)  | 437/355<br>8 (5.0)   | 465/453<br>5 (10.3)  | 475/461<br>0 (10.3)  | 481/440<br>5 (10.9)  | 476/453<br>8 (10.5)  | 460/458<br>2 (10.0)  | 436/421<br>7 (10.3)  | 433/426<br>5 (10.2)  | 449/431<br>3 (10.4)  | 458/431<br>4 (10.6)  | 461/425<br>3 (10.8)  | 392/372<br>5 (10.5)   |
| Missing or not applicable to walk in patients           | 5628<br>(63.5)       | 5204<br>(61.7)       | 5159<br>(59.2)       | 4025<br>(47.0)       | 4065<br>(46.9)       | 4116<br>(48.3)       | 4004<br>(46.9)       | 4040<br>(46.9)       | 3357<br>(44.3)       | 3599<br>(45.8)       | 3630<br>(45.7)       | 3559<br>(45.2)       | 3673<br>(46.3)       | 3042<br>(45.0)        |
| Heart failure documented on first medical contact       |                      |                      |                      |                      |                      |                      |                      |                      |                      |                      |                      |                      |                      |                       |
| Yes                                                     | 406/582<br>6 (7.0)   | 432/596<br>0 (7.2)   | 486/628<br>4 (7.7)   | 599/833<br>0 (7.2)   | 679/851<br>2 (8.0)   | 621/830<br>2 (7.5)   | 608/833<br>3 (7.3)   | 650/842<br>5 (7.7)   | 562/734<br>6 (7.7)   | 586/762<br>6 (7.7)   | 608/768<br>3 (7.9)   | 667/760<br>5 (8.8)   | 667/765<br>6 (8.7)   | 521/650<br>6 (8.0)    |
| Missing                                                 | 3032<br>(34.2)       | 2469<br>(29.3)       | 2433<br>(27.9)       | 230 (2.7)            | 163 (1.9)            | 219 (2.6)            | 209 (2.4)            | 197 (2.3)            | 228 (3.0)            | 238 (3.0)            | 260 (3.3)            | 268 (3.4)            | 270 (3.4)            | 261 (3.9)             |
| Cardiogenic shock documented on first medical contact   |                      |                      |                      |                      |                      |                      |                      |                      |                      |                      |                      |                      |                      |                       |
| Yes                                                     | 427/583<br>2 (7.3)   | 423/593<br>8 (7.1)   | 447/625<br>8 (7.1)   | 574/832<br>6 (6.9)   | 622/850<br>1 (7.3)   | 596/829<br>9 (7.2)   | 608/833<br>0 (7.3)   | 621/841<br>7 (7.4)   | 527/734<br>6 (7.2)   | 540/763<br>6 (7.1)   | 582/768<br>6 (7.6)   | 585/761<br>2 (7.7)   | 594/765<br>2 (7.8)   | 484/649<br>9<br>(7.4) |
| Missing                                                 | 3026<br>(34.2)       | 2491<br>(29.6)       | 2459<br>(28.2)       | 234 (2.7)            | 174 (2.0)            | 222 (2.6)            | 212 (2.5)            | 205 (2.4)            | 228 (3.0)            | 228 (2.9)            | 257 (3.2)            | 261 (3.3)            | 274 (3.5)            | 268 (4.0)             |
| Covid-19 infection <sup>a</sup>                         | NA                   | 17 (0.2)             | 18 (0.2)             | 48 (0.6)             | 58 (0.7)             | 54 (0.7)             | 37 (0.5)              |
| History of smoking                                      |                      |                      |                      |                      |                      |                      |                      |                      |                      |                      |                      |                      |                      |                       |
| Yes                                                     | 3527/88<br>47 (39.9) | 3233/84<br>21 (38.4) | 3174/87<br>08 (36.4) | 3294/81<br>55 (40.4) | 3287/82<br>45 (39.9) | 3218/81<br>13 (39.7) | 3284/81<br>70 (40.2) | 3318/80<br>32 (41.3) | 2872/69<br>84 (41.1) | 3088/73<br>42 (42.1) | 2906/74<br>26 (39.1) | 2890/75<br>48 (38.3) | 2908/75<br>67 (38.4) | 2463/65<br>82 (34.4)  |
| Missing                                                 | 11 (0.1)             | 8 (0.1)              | 9 (0.1)              | 405 (4.7)            | 430 (5.0)            | 408 (4.8)            | 372 (4.4)            | 590 (6.8)            | 590 (7.8)            | 522 (6.6)            | 517 (6.6)            | 325 (4.1)            | 359 (4.5)            | 185 (2.7)             |
| Direct presenting to PCI hospital via EMS               | 4304<br>(48.6)       | 4121<br>(48.9)       | 4296<br>(49.3)       | 4284<br>(50.0)       | 4386<br>(50.6)       | 4165<br>(48.9)       | 4267<br>(50.0)       | 4253<br>(49.3)       | 3917<br>(51.7)       | 3980<br>(50.6)       | 4008<br>(50.5)       | 3967<br>(50.4)       | 3931<br>(49.6)       | 3424<br>(50.6)        |
| Direct presenting to PCI-capable hospital - via walk in | 2574<br>(29.1)       | 2390<br>(28.4)       | 2456<br>(28.2)       | 2572<br>(30.0)       | 2635<br>(30.4)       | 2603<br>(30.5)       | 2485<br>(29.1)       | 2449<br>(28.4)       | 1992<br>(26.3)       | 2112<br>(26.9)       | 2110<br>(26.6)       | 2099<br>(26.7)       | 2208<br>(27.9)       | 1798<br>(26.6)        |

|                                                                |                      |                        |                      |                      |                         |                      |                      |                      |                      |                      |                      |                      |                      |                      |
|----------------------------------------------------------------|----------------------|------------------------|----------------------|----------------------|-------------------------|----------------------|----------------------|----------------------|----------------------|----------------------|----------------------|----------------------|----------------------|----------------------|
| Transferred from other facility to PCI hospital via air/ground | 1980<br>(22.4)       | 1918<br>(22.8)         | 1965<br>(22.5)       | 1704<br>(19.9)       | 1654<br>(19.1)          | 1753<br>(20.6)       | 1790<br>(21.0)       | 1920<br>(22.3)       | 1665<br>(22.0)       | 1772<br>(22.5)       | 1825<br>(23.0)       | 1807<br>(23.0)       | 1787<br>(22.5)       | 1545<br>(22.8)       |
| Destination pre-arrival alert or notification                  | 3588<br>(40.5)       | 3425<br>(40.6)         | 3602<br>(41.3)       | 2983<br>(34.8)       | 3017<br>(34.8)          | 2997<br>(35.2)       | 3079<br>(36.0)       | 3250<br>(37.7)       | 2952<br>(39.0)       | 3043<br>(38.7)       | 3042<br>(38.3)       | 3262<br>(41.4)       | 3215<br>(40.6)       | 2961<br>(43.8)       |
| Treatment                                                      |                      |                        |                      |                      |                         |                      |                      |                      |                      |                      |                      |                      |                      |                      |
| PCI                                                            | 7459/86<br>49 (86.2) | 7197/83<br>41 (86.3)   | 7389/86<br>12 (85.8) | 7151/84<br>41 (84.7) | 7214/84<br>86<br>(85.0) | 7242/83<br>21 (87.0) | 7260/83<br>86 (86.6) | 7459/86<br>04 (86.7) | 6495/75<br>05 (86.5) | 6629/76<br>83 (86.3) | 6708/78<br>04 (86.0) | 6598/77<br>21 (85.5) | 6650/77<br>69 (85.6) | 5716/66<br>61 (85.8) |
| Thrombolytics                                                  | 383/864<br>9 (4.4)   | 382/834<br>1 (4.6)     | 402/861<br>2 (4.7)   | 383/844<br>1 (4.5)   | 347/848<br>6 (4.1)      | 346/832<br>1 (4.2)   | 366/838<br>6 (4.4)   | 386/860<br>4 (4.5)   | 364/750<br>5 (4.9)   | 349/768<br>3 (4.5)   | 367/780<br>4 (4.7)   | 384/772<br>1 (5.0)   | 345/776<br>9 (4.4)   | 311/666<br>1 (4.7)   |
| No treatment                                                   | 1016/86<br>49 (11.7) | 850/834<br>1<br>(10.2) | 926/861<br>2 (10.8)  | 1026/84<br>41 (12.2) | 1114/84<br>86 (11.8)    | 933/832<br>1 (11.2)  | 916/838<br>6 (10.9)  | 777/860<br>4 (9.0)   | 715/750<br>5 (9.5)   | 886/768<br>3 (11.5)  | 868/780<br>4 (11.1)  | 891/772<br>1 (11.5)  | 931/776<br>9 (12.0)  | 740/666<br>1 (11.1)  |
| Missing                                                        | 209 (2.4)            | 88 (1.0)               | 105 (1.2)            | 119 (1.4)            | 189 (2.2)               | 200 (2.3)            | 156 (1.8)            | 18 (0.2)             | 69 (0.9)             | 181 (2.3)            | 139 (1.8)            | 152 (1.9)            | 157 (2.0)            | 106 (1.6)            |
| In-hospital mortality                                          | 496 (5.6)            | 489 (5.8)              | 613 (7)              | 575 (6.7)            | 573 (6.6)               | 551 (6.5)            | 617 (7.2)            | 571 (6.6)            | 544 (7.2)            | 546 (6.9)            | 627 (7.9)            | 683 (8.7)            | 611 (7.7)            | 485 (7.2)            |
| In-hospital mortality adjusted odds ratio (95% odds ratio)     | Reference            | 0.88(0.71-1.08)        | 1.18 (0.97-1.43)     | 1.11 (0.92-1.33)     | 1.09 (0.91-1.32)        | 1.06 (0.88-1.28)     | 1.16(0.97-1.40)      | 1.08(0.90-1.30)      | 1.22 (1.01-1.47)     | 1.15(0.95-1.38)      | 1.29(1.08-1.55)      | 1.38 (1.15-1.65)     | 1.26 (1.05-1.51)     | 1.17 (0.97-1.41)     |

<sup>a</sup> Covid-19 infection recorded when a confirmed diagnosis was documented by the provider or when a positive test result was documented in the patient medical record.

eTable 4. Hospital-Specified Reasons for Delay by Year Quarter

| Reasons                                                            | Patients, Number (%) |                   |                   |                      |                      |                      |                      |                      |                      |                      |                      |                      |                      |                      | Total           |
|--------------------------------------------------------------------|----------------------|-------------------|-------------------|----------------------|----------------------|----------------------|----------------------|----------------------|----------------------|----------------------|----------------------|----------------------|----------------------|----------------------|-----------------|
|                                                                    | Q2 2018<br>N=8858    | Q3 2018<br>N=8429 | Q4 2018<br>N=8717 | Q1<br>2019<br>N=8560 | Q2<br>2019<br>N=8675 | Q3<br>2019<br>N=8521 | Q4<br>2019<br>N=8542 | Q1<br>2020<br>N=8622 | Q2<br>2020<br>N=7574 | Q3<br>2020<br>N=7864 | Q4<br>2020<br>N=7943 | Q1<br>2021<br>N=7873 | Q2<br>2021<br>N=7926 | Q3<br>2021<br>N=6767 |                 |
| Cardiac arrest and/or need for intubation                          | 540<br>(6.1)         | 537<br>(6.4)      | 544<br>(6.2)      | 516<br>(6.0)         | 550<br>(6.3)         | 561<br>(6.6)         | 568<br>(6.6)         | 584<br>(6.8)         | 533<br>(7.0)         | 584<br>(7.4)         | 595<br>(7.5)         | 599<br>(7.6)         | 583<br>(7.4)         | 502<br>(7.4)         | 7796<br>(6.8)   |
| Other reasons                                                      | 460<br>(5.2)         | 428<br>(5.1)      | 475<br>(5.4)      | 434<br>(5.1)         | 438<br>(5.0)         | 409<br>(4.8)         | 457<br>(5.4)         | 485<br>(5.6)         | 634<br>(8.4)         | 476<br>(6.1)         | 555<br>(7.0)         | 543<br>(6.9)         | 493<br>(6.2)         | 388<br>(5.7)         | 6675<br>(5.8)   |
| Difficulty crossing the culprit lesion                             | 281<br>(3.2)         | 279<br>(3.3)      | 290<br>(3.3)      | 287<br>(3.4)         | 290<br>(3.3)         | 314<br>(3.7)         | 307<br>(3.6)         | 364<br>(4.2)         | 337<br>(4.4)         | 349<br>(4.4)         | 366<br>(4.6)         | 338<br>(4.3)         | 326<br>(4.1)         | 275<br>(4.1)         | 4403<br>(3.8)   |
| Difficult vascular access                                          | 242(2.7)             | 206(2.4)          | 250(2.9)          | 194<br>(2.3)         | 146<br>(1.7)         | 179<br>(2.1)         | 206<br>(2.4)         | 182<br>(2.1)         | 184<br>(2.4)         | 186<br>(2.4)         | 225<br>(2.8)         | 260<br>(3.3)         | 213<br>(2.7)         | 189<br>(2.8)         | 2862<br>(2.5)   |
| Need for additional PPE for suspected/confirmed infectious disease | NA                   | NA                | NA                | NA                   | NA                   | NA                   | NA                   | 29 (0.3)             | 407<br>(5.4)         | 299<br>(3.8)         | 300<br>(3.8)         | 215<br>(2.7)         | 89 (1.1)             | 85 (1.3)             | 1424<br>(1.2)   |
| Patient delays in providing consent                                | 48 (0.5)             | 63 (0.7)          | 66 (0.8)          | 75 (0.9)             | 64 (0.7)             | 56 (0.7)             | 60 (0.7)             | 72 (0.8)             | 104<br>(1.4)         | 74 (0.9)             | 67 (0.8)             | 74 (0.9)             | 80 (1.0)             | 58 (0.9)             | 961<br>(0.8)    |
| Emergent placement of LV support device                            | NA                   | NA                | NA                | 10 (0.1)             | 11 (0.1)             | 12 (0.1)             | 53 (0.6)             | 118<br>(1.4)         | 87 (1.1)             | 120<br>(1.5)         | 132<br>(1.7)         | 151<br>(1.9)         | 147<br>(1.9)         | 118<br>(1.7)         | 959<br>(0.8)    |
| One or more reasons for delay                                      | 1515<br>(17.1)       | 1452<br>(17.2)    | 1549<br>(17.8)    | 1419<br>(16.6)       | 1416<br>(16.3)       | 1426<br>(16.7)       | 1520<br>(17.8)       | 1693<br>(19.6)       | 1933<br>(25.5)       | 1801<br>(22.9)       | 1934<br>(24.3)       | 1848<br>(23.5)       | 1659<br>(20.9)       | 1415<br>(20.9)       | 22580<br>(19.7) |



eTable 5. Model Diagnostics for Multivariate Logistic Regression

| <b>Subgroup</b>   | <b>Adjusted multivariate model</b>                                            | <b>AUROC</b> | <b>Deviance residuals median (IQR)</b> |
|-------------------|-------------------------------------------------------------------------------|--------------|----------------------------------------|
| EMS               | First medical contact to catheterization laboratory activation (20 min.)      | 0.85         | -0.23 (-0.32, -0.17)                   |
|                   | Emergency department time (15 min.)                                           | 0.85         | -0.27 (-0.38, -0.19)                   |
|                   | First medical contact to device (90 min.)                                     | 0.85         | -0.22 (-0.33, -0.16)                   |
| Walk in           | First medical contact /hospital arrival to ECG (10 min.)                      | 0.80         | -0.18 (-0.24, -0.14)                   |
|                   | First medical contact /hospital arrival to device contact to device (90 min.) | 0.80         | -0.16 (-0.22, -0.13)                   |
| Transfer patients | Door in door out (30 min.)                                                    | 0.83         | -0.35 (-0.49, -0.26)                   |
|                   | First medical contact / first hospital arrival to device (120 min.)           | 0.84         | -0.32 (-0.44, -0.23)                   |

Abbreviation: AUROC = Area under receiver operating characteristic curve, IQR = Inter-quartile range
