# Supplementary material
Source: PubMed Central journal article supplement (PMC9638953)
Supplement: jama-e2220149-s002.pdf [file jama-e2220149-s002.pdf]

## **Data Sharing Statement**

### **Data**

**Data available:** No

### **Additional Information**

**Explanation for why data not available:** I had full access to the data. They are secured by the American Heart Association. AHA has a formal process for sharing data to which interested colleagues may apply.
